# Supplementary material for: Studies on the effect of polyhedral carboranes on the physicochemical properties of polycarboranosiloxanes
Source: Royal Society of Chemistry journal article supplement (doi:10.1039/d2py01539k), 2023-01-01
Supplement: d2py01539k1.pdf [file d2py01539k1.pdf]

## Supplementary Material

### Studies on the effect of polyhedral carboranes on the physicochemical properties of polycarboranosiloxanes

E.O. Minyaylo<sup>a,b,\*</sup>, V.Yu. Zubova<sup>a,c</sup>, A.V. Zaitsev<sup>a</sup>, V.A. Ol'shevskaya<sup>a</sup>, G.G. Nikiforova<sup>a</sup>, M.I. Buzin<sup>a</sup>, A.A. Anisimov<sup>a,b,\*</sup>, A.M. Muzafarov<sup>a,d</sup>

<sup>a</sup> *A. N. Nesmeyanov Institute of Organoelement Compounds, Russian Academy of Sciences, 119991 Moscow, Russia*

<sup>b</sup> *Tula State Lev Tolstoy Pedagogical University, 300026, Tula, Russia*

<sup>c</sup> *D. I. Mendeleev University of Chemical Technology of Russia, 125047, Moscow, Russia*

<sup>d</sup> *Enikolopov Institute of Synthetic Polymeric Materials of the Russian Academy of Sciences, 117393 Moscow, Russia*

\* [ekaminyaylo1995@mail.ru](mailto:ekaminyaylo1995@mail.ru)

\* [anisimov.ineos@gmail.com](mailto:anisimov.ineos@gmail.com).

### Table of contents

|                                                      |     |
|------------------------------------------------------|-----|
| <b>SEC data</b> .....                                | S2  |
| <i>SEC data of the compounds 1A – 1D</i> .....       | S2  |
| <i>SEC data of the compound o-2A</i> .....           | S3  |
| <i>SEC data of the compound 3B</i> .....             | S3  |
| <b>NMR data</b> .....                                | S4  |
| <i>NMR data of the compound 3B</i> .....             | S8  |
| <b>IR data</b> .....                                 | S10 |
| <i>IR data of the compounds 2A – 2D</i> .....        | S10 |
| <i>IR data of the compound 3B</i> .....              | S12 |
| <b>Rheological studies data</b> .....                | S13 |
| <i>Flow curves of the compounds 2B – 2C, 3</i> ..... | S13 |
| <b>DSC data of the compound 2A</b> .....             | S15 |

SEC data

SEC data of the compounds 1A – 1D:

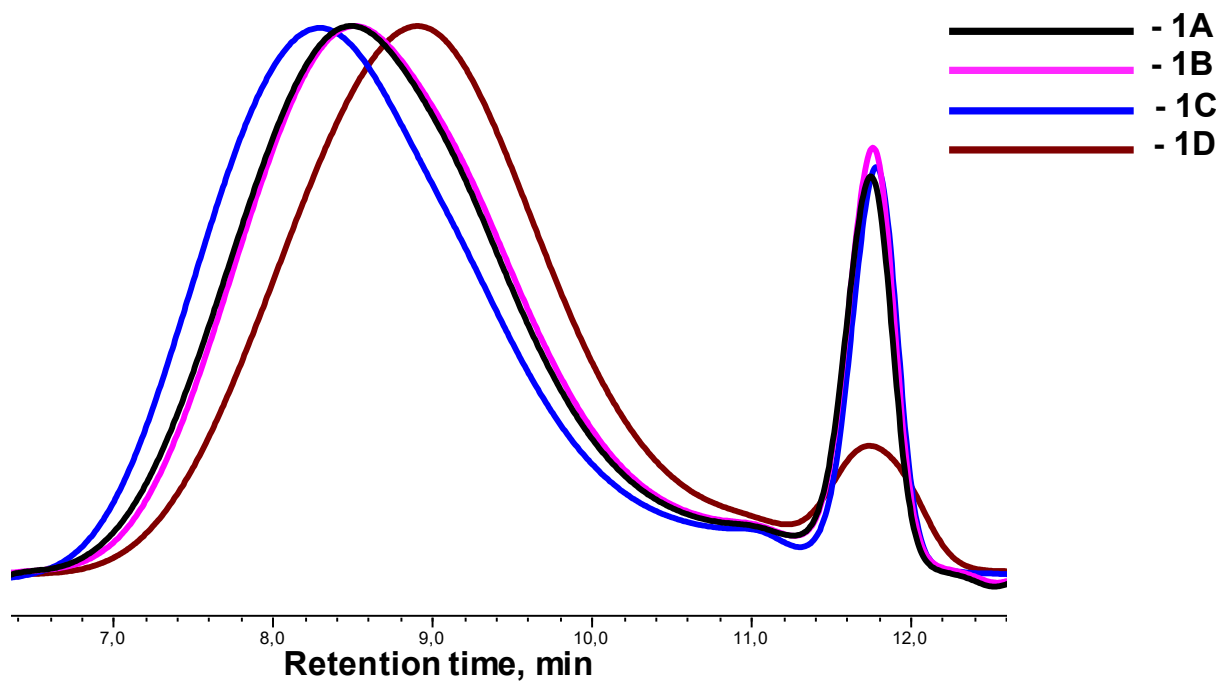

Figure S1. SEC curves of the 1A – 1D before reprecipitation

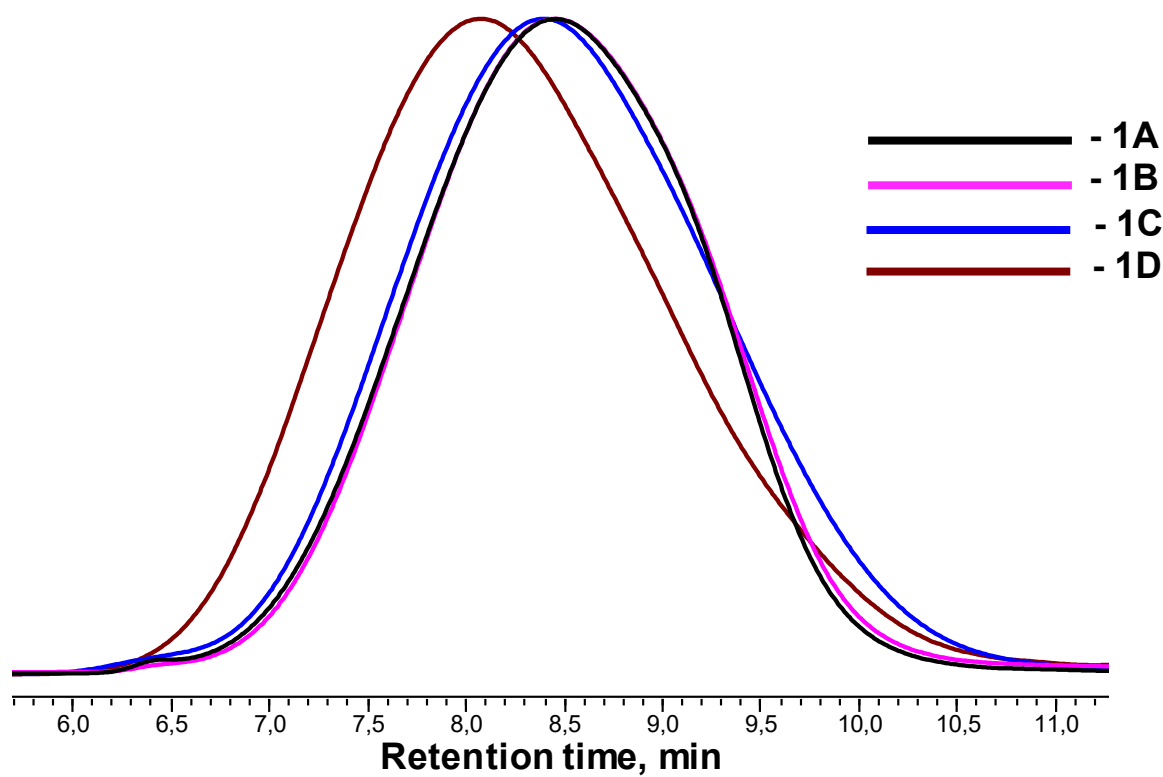

Figure S2. SEC curves of the 1A – 1D after reprecipitation

SEC data of the compound *o*-2A:

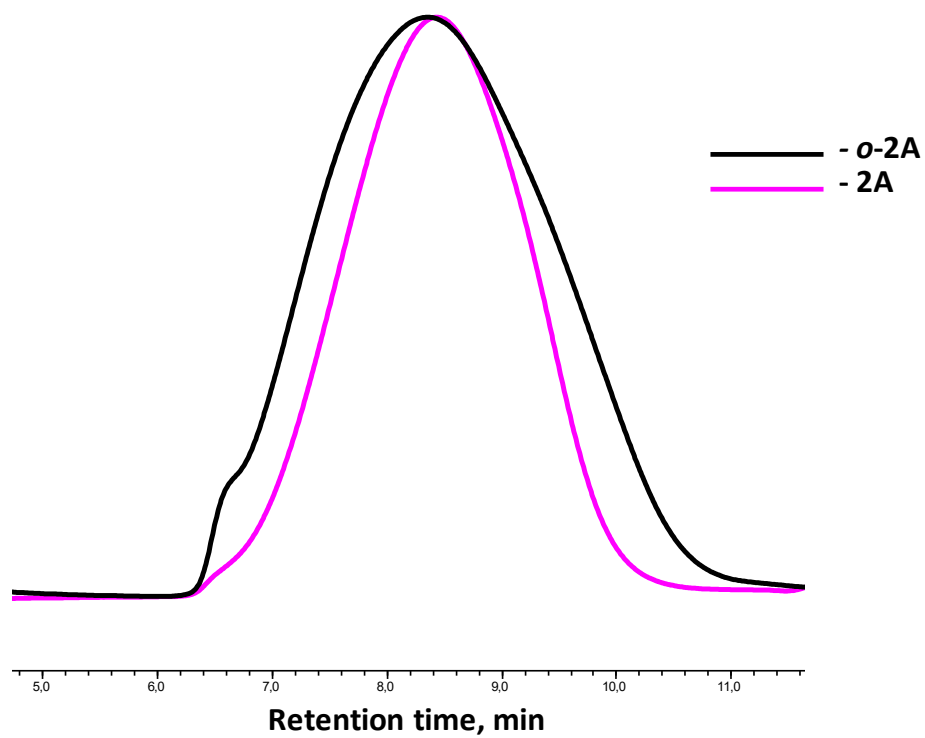

**Figure S3.** SEC curves of the 2A and *o*-2A

SEC data of the compound 3B:

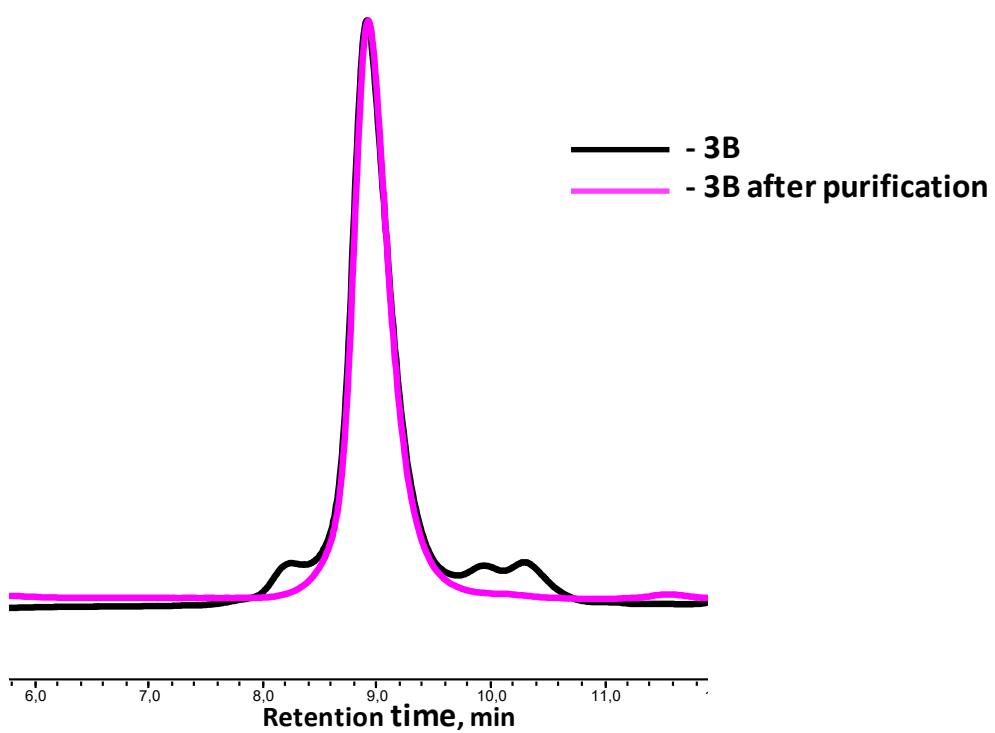

**Figure S4.** SEC curves of the 3B before and after preparative purification

**NMR data**

NMR data of the compounds 1A – 2D; o-2A:

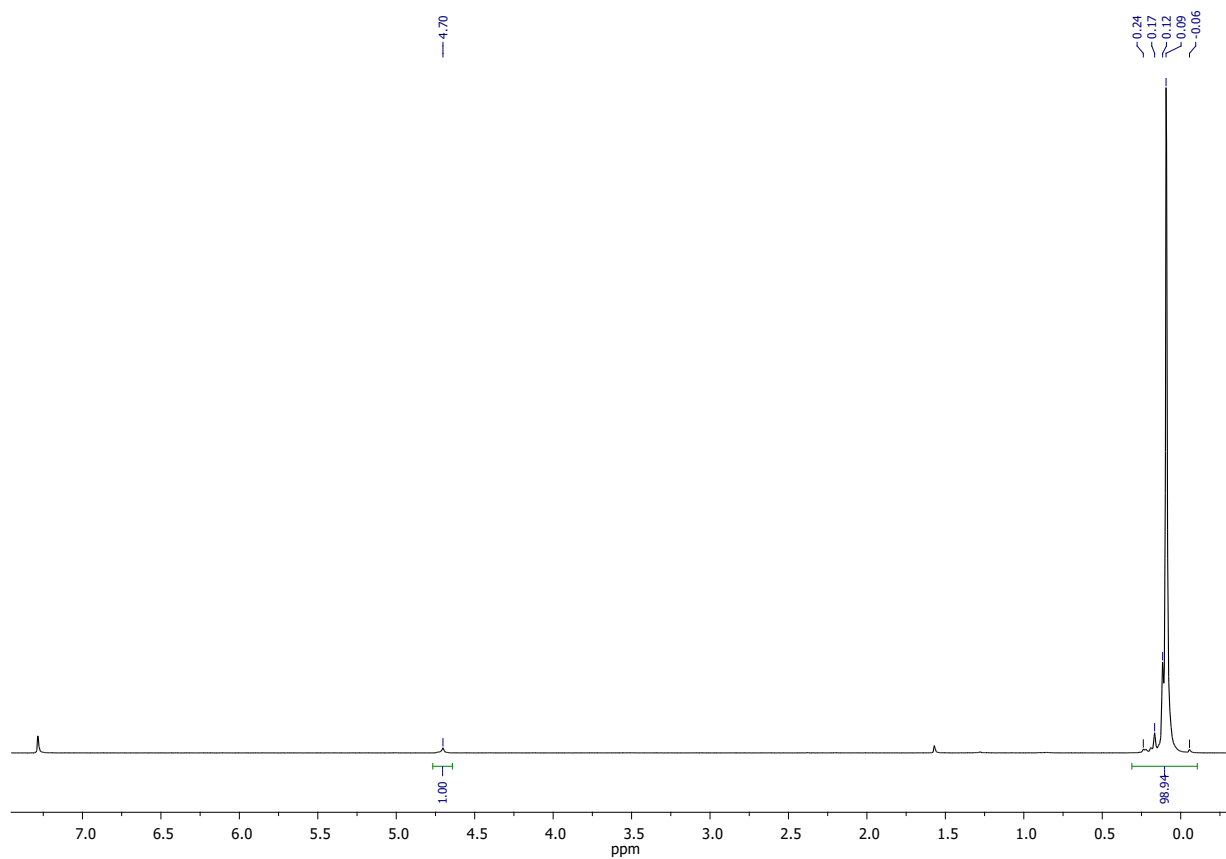

**Figure S5.** <sup>1</sup>H NMR (500.13 MHz, CDCl<sub>3</sub>) of (1A)

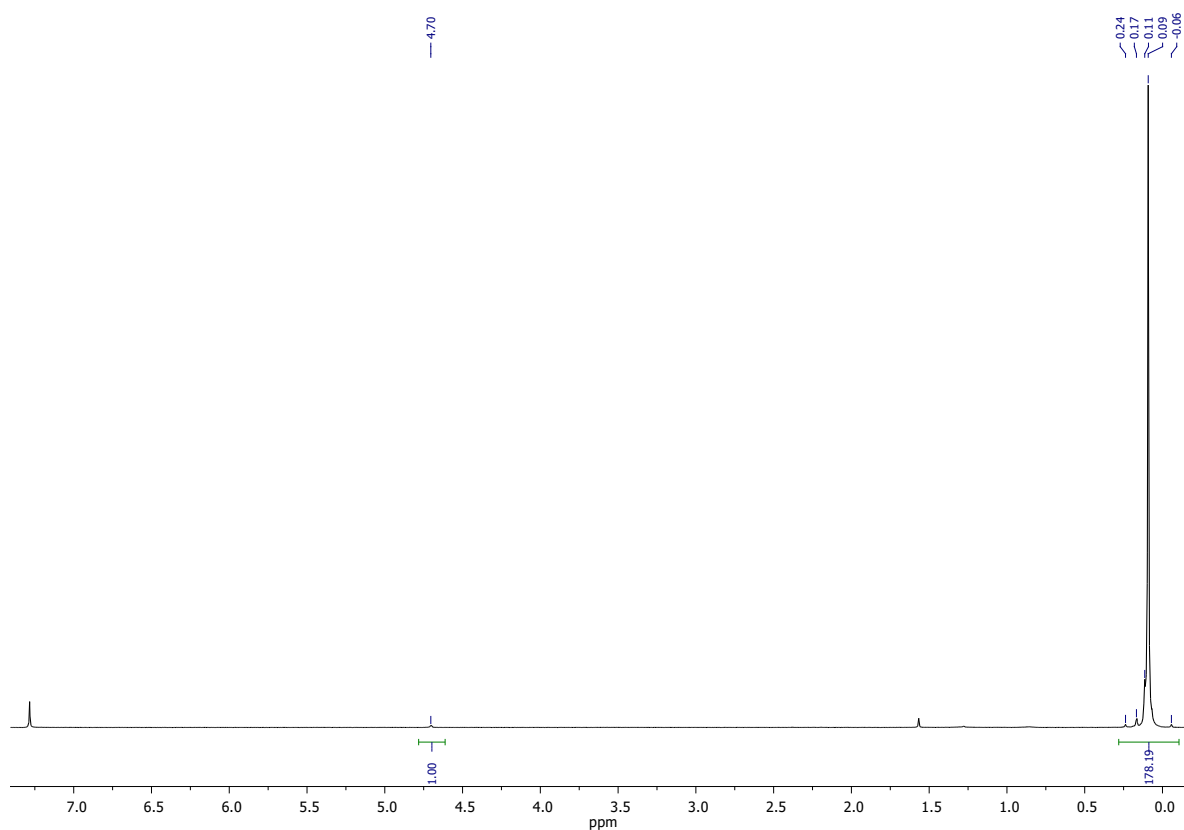

**Figure S6.** <sup>1</sup>H NMR (500.13 MHz, CDCl<sub>3</sub>) of (1B)

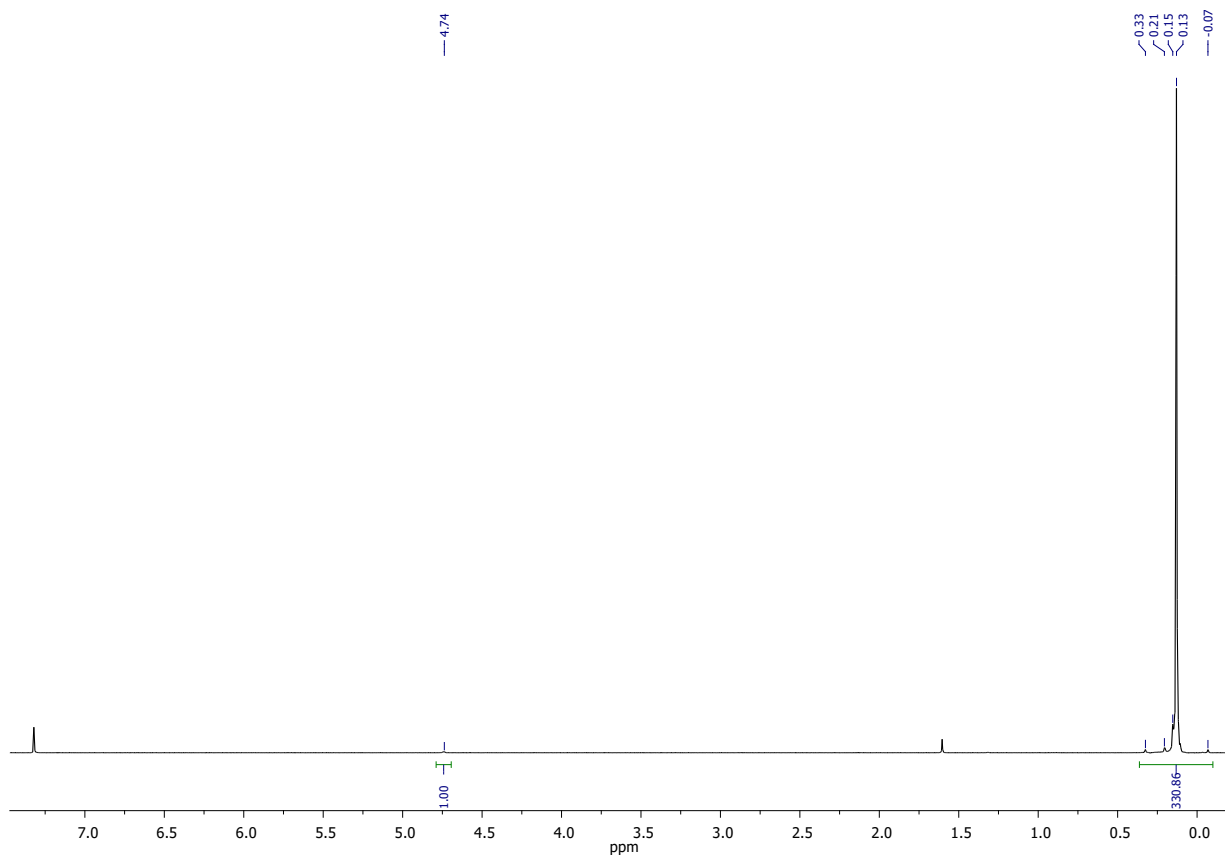

**Figure S7.**  $^1\text{H}$  NMR (500.13 MHz,  $\text{CDCl}_3$ ) of **(1C)**

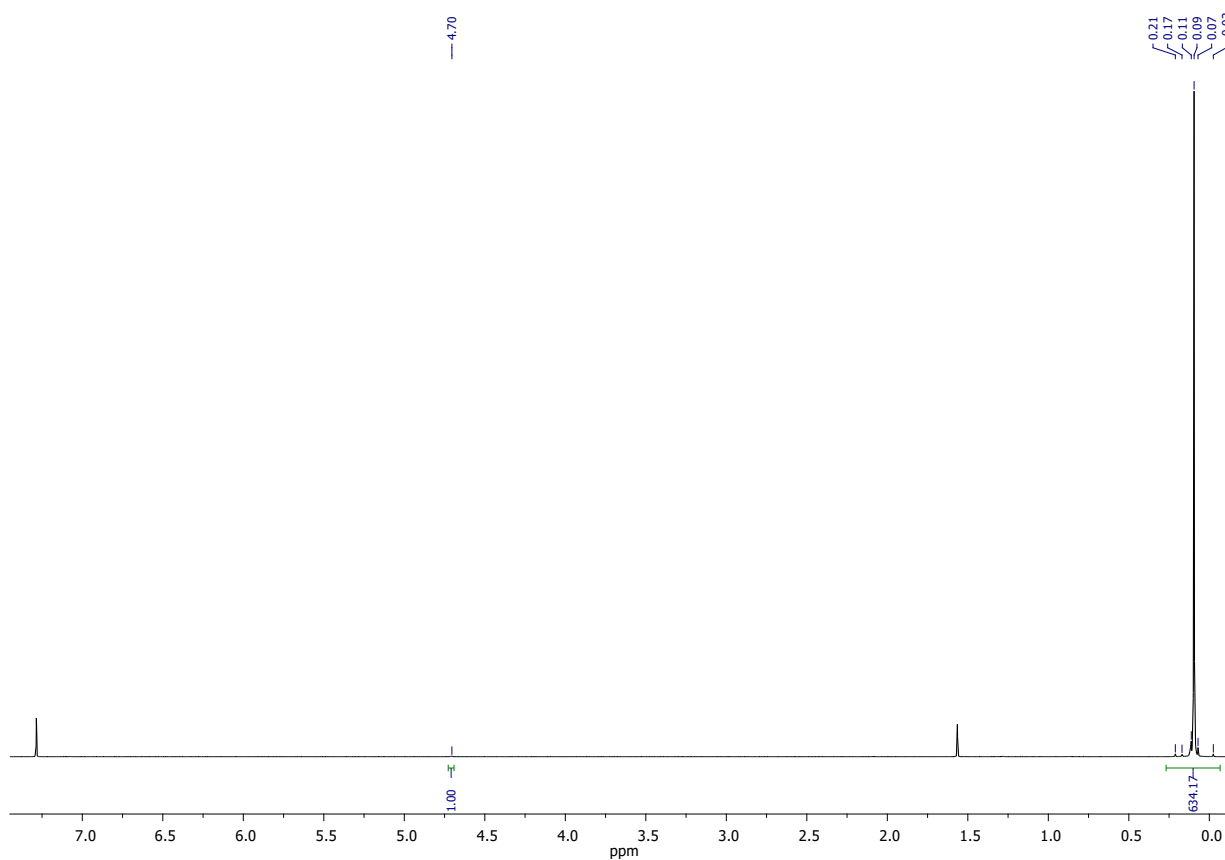

**Figure S8.**  $^1\text{H}$  NMR (500.13 MHz,  $\text{CDCl}_3$ ) of **(1D)**

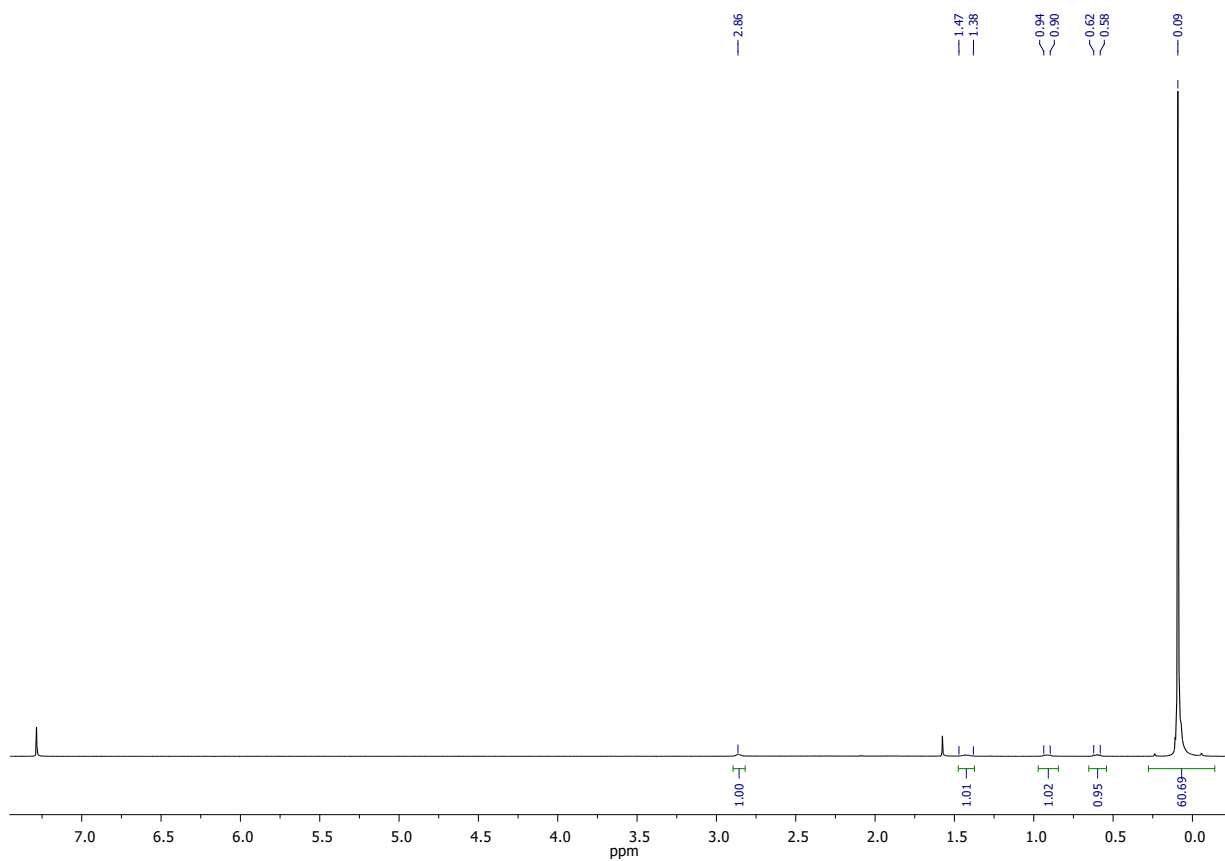

**Figure S9.**  $^1\text{H}$  NMR (500.13 MHz,  $\text{CDCl}_3$ ) of **(2B)**

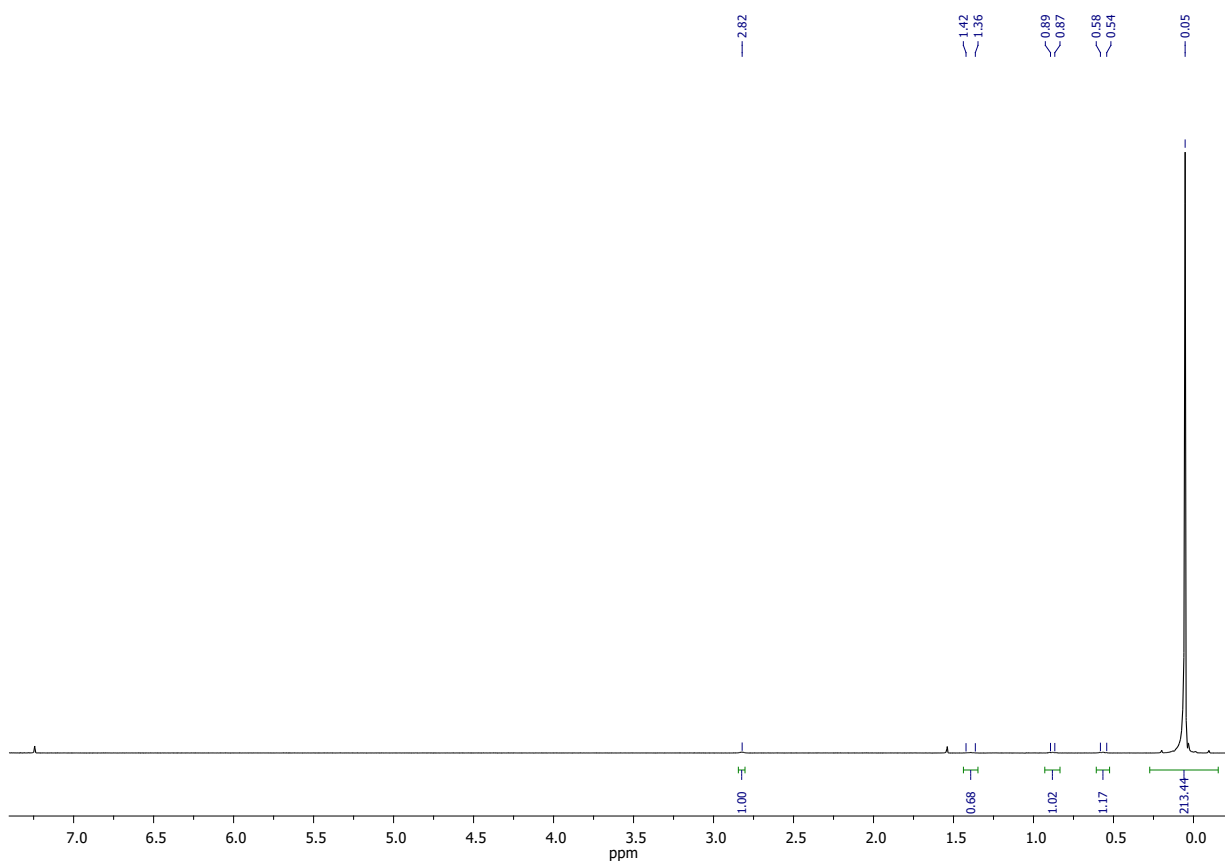

**Figure S10.**  $^1\text{H}$  NMR (500.13 MHz,  $\text{CDCl}_3$ ) of **(2C)**

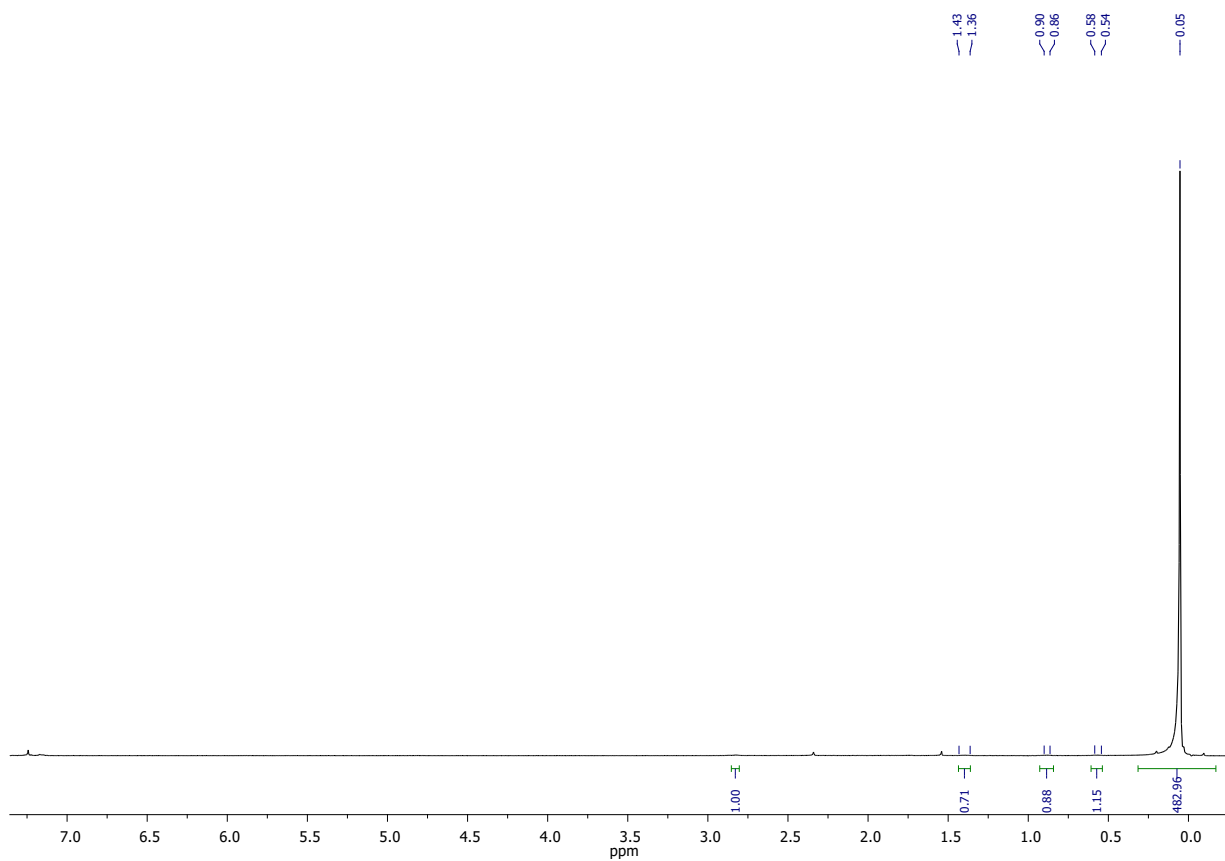

**Figure S11.**  $^1\text{H}$  NMR (500.13 MHz,  $\text{CDCl}_3$ ) of (**2D**)

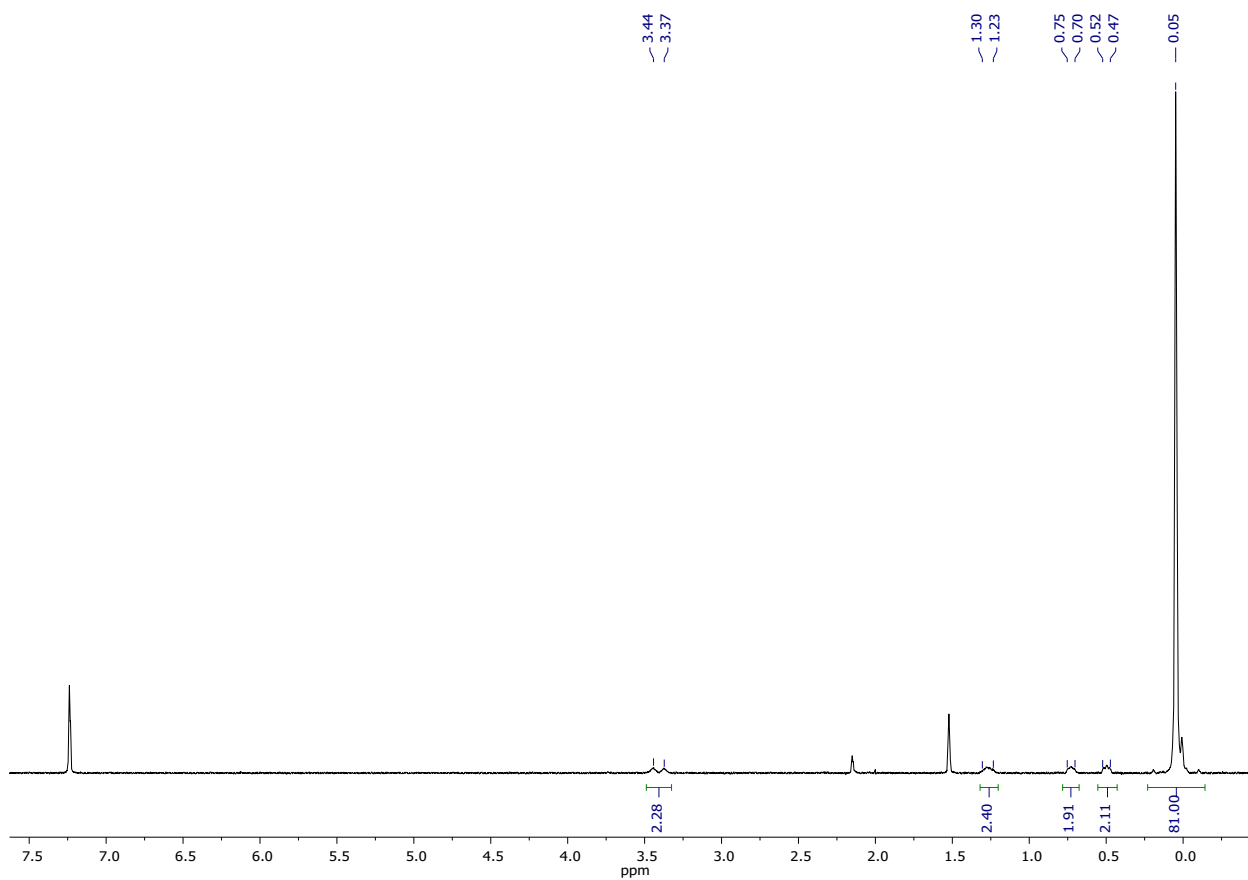

**Figure S12.**  $^1\text{H}$  NMR (500.13 MHz,  $\text{CDCl}_3$ ) of (*o*-**2A**)

NMR data of the compound 3B:

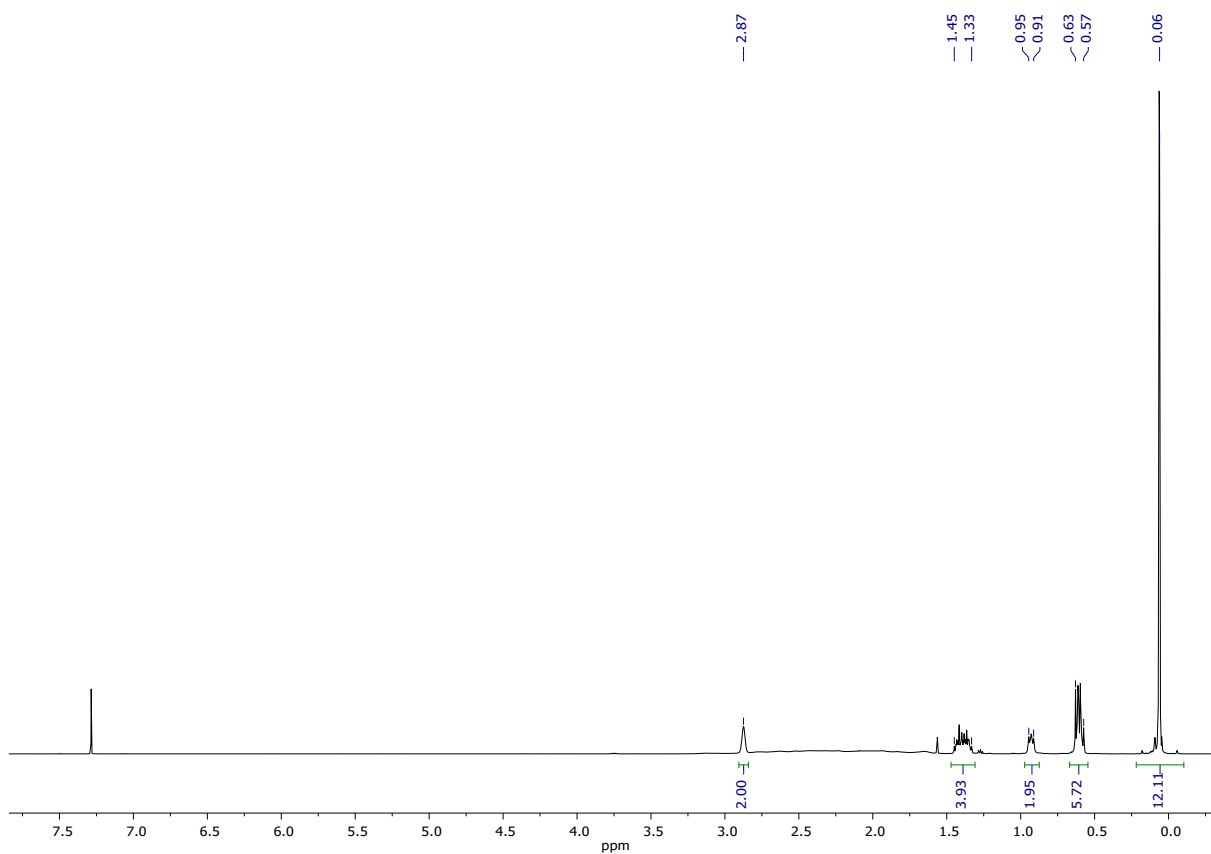

**Figure S13.** <sup>1</sup>H NMR (500.13 MHz, CDCl<sub>3</sub>) of (2B)

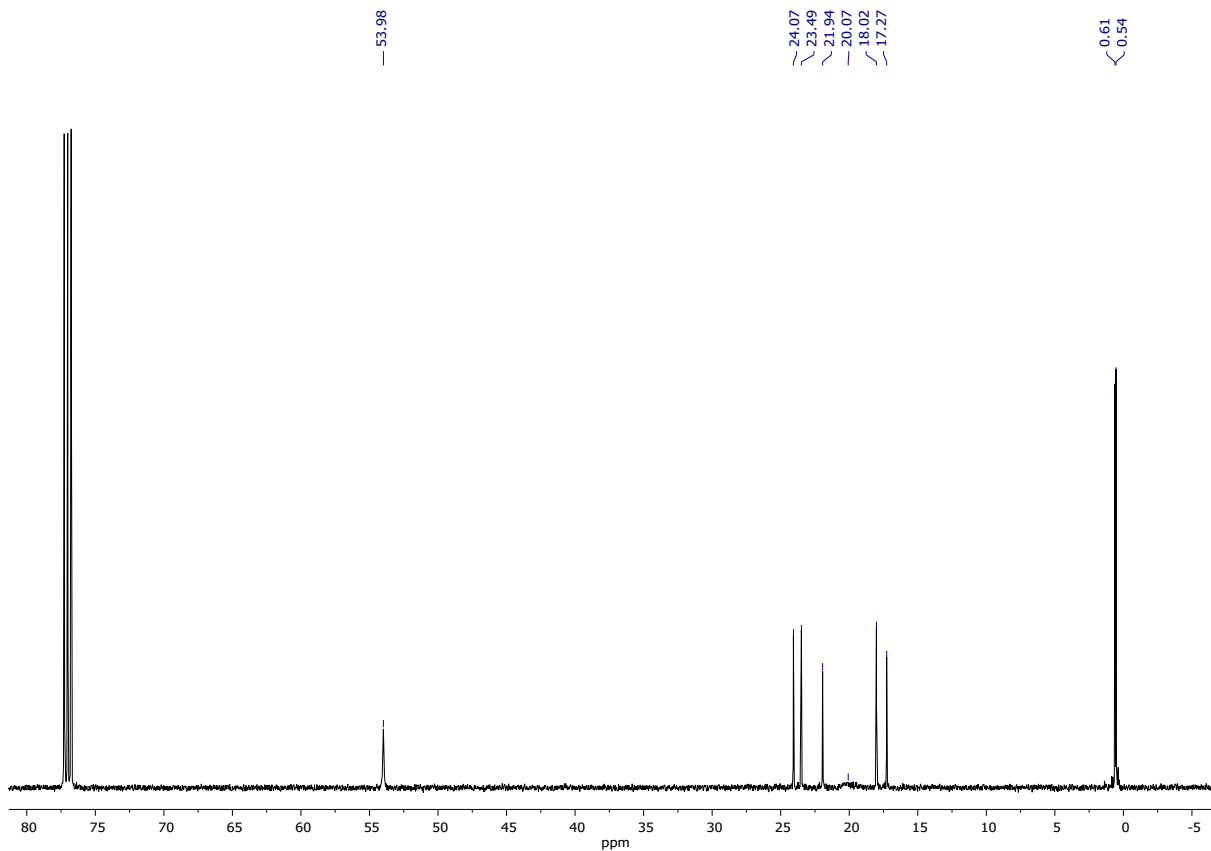

**Figure S14.** <sup>13</sup>C NMR (125.47 MHz, CDCl<sub>3</sub>) of (2B)



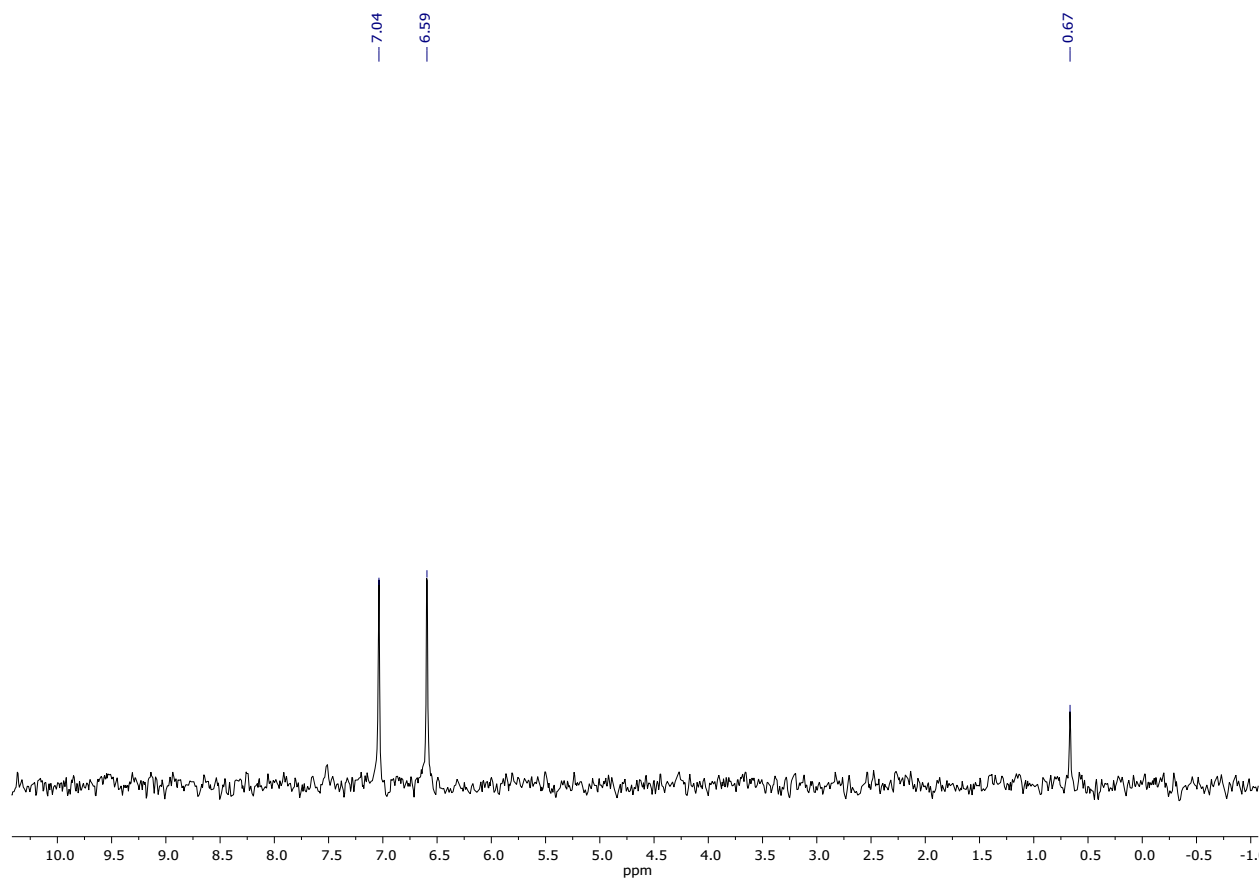

**Figure S15.**  $^{29}\text{Si}$  NMR (99.36 MHz,  $\text{CDCl}_3$ ) of **(2B)**

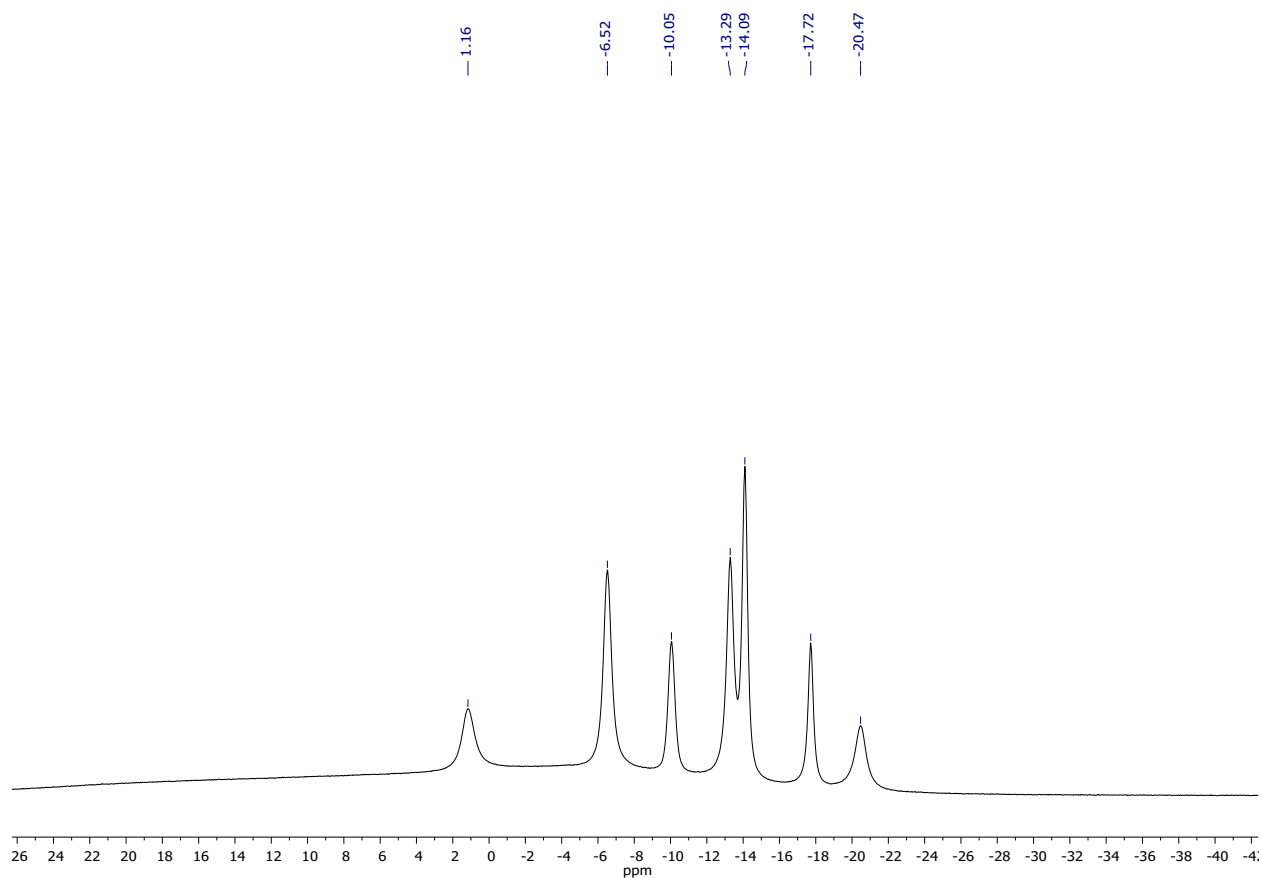

**Figure S16.**  $^{11}\text{B}\{^1\text{H}\}$  NMR (160.46 MHz,  $\text{CDCl}_3$ ) of **(2B)**

**IR data**

IR data of the compounds 2A – 2D:

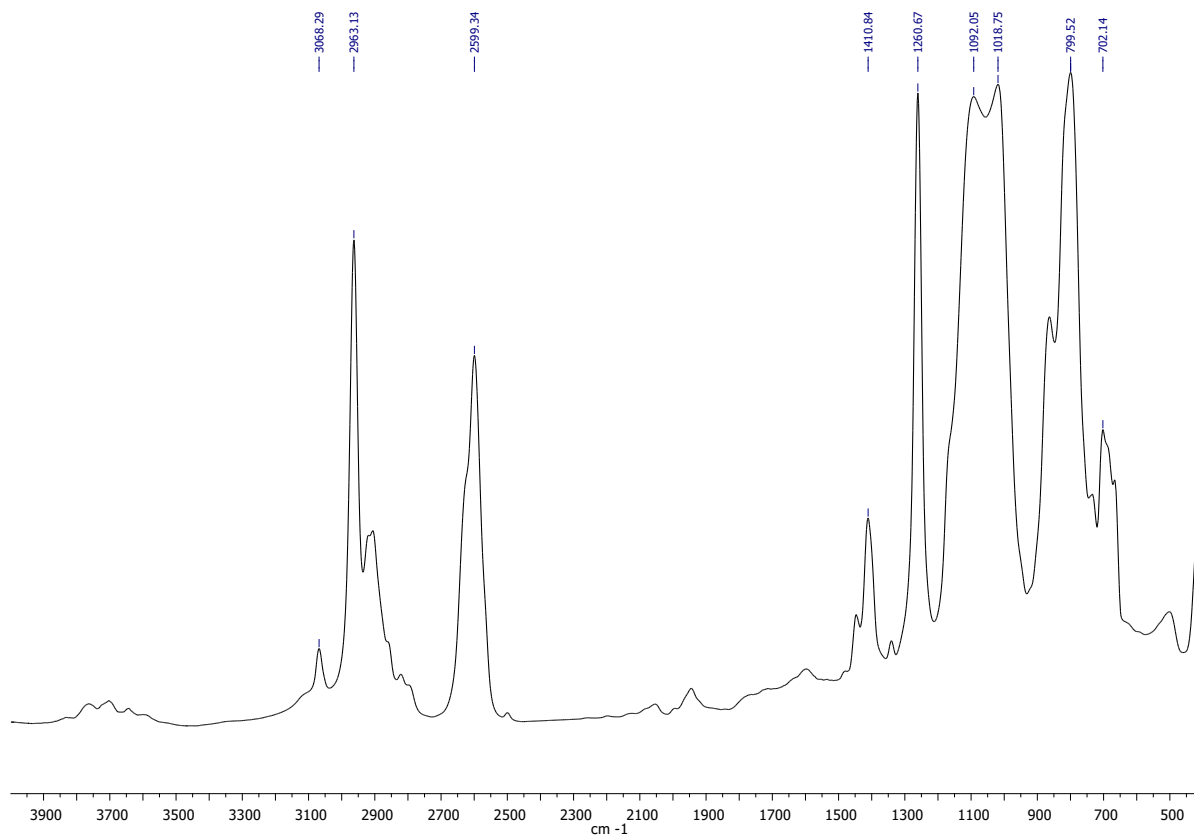

**Figure S17. IR (cm<sup>-1</sup>) of (2A)**

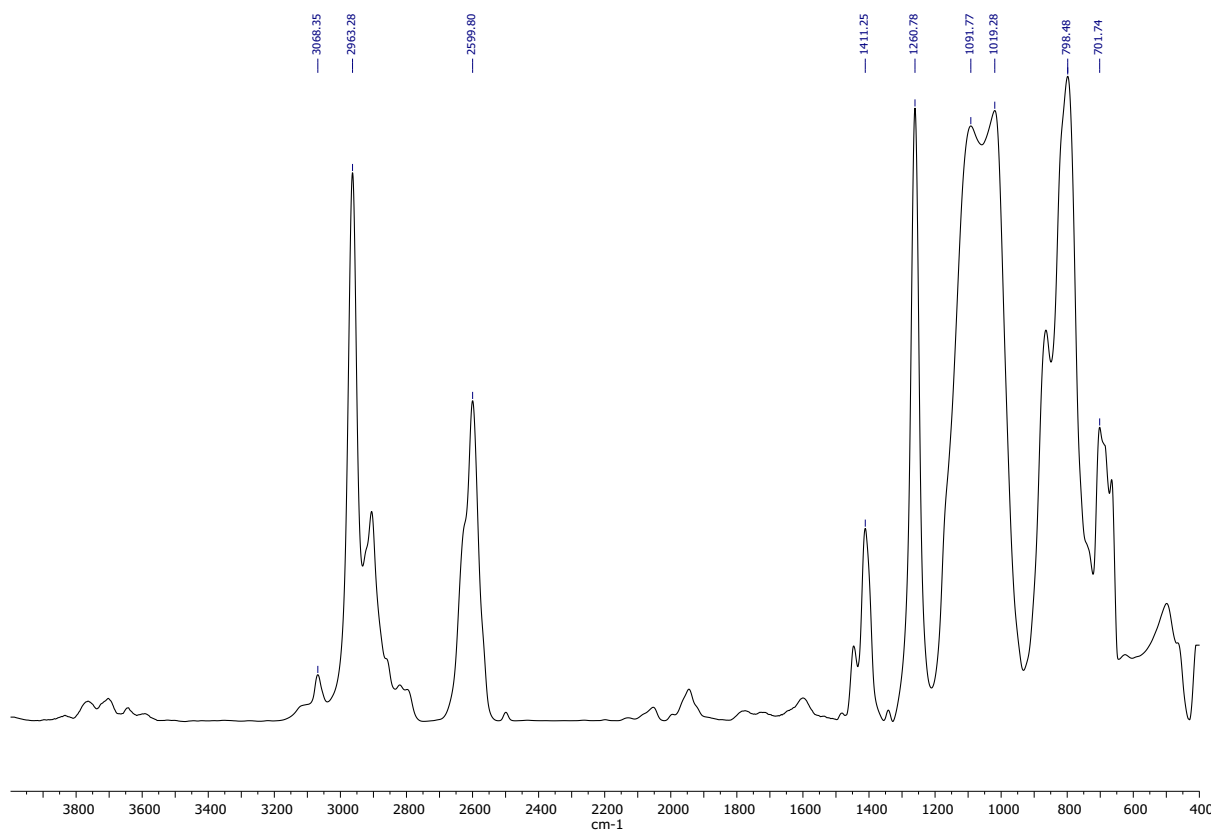

**Figure S18. IR (cm<sup>-1</sup>) of (2B)**

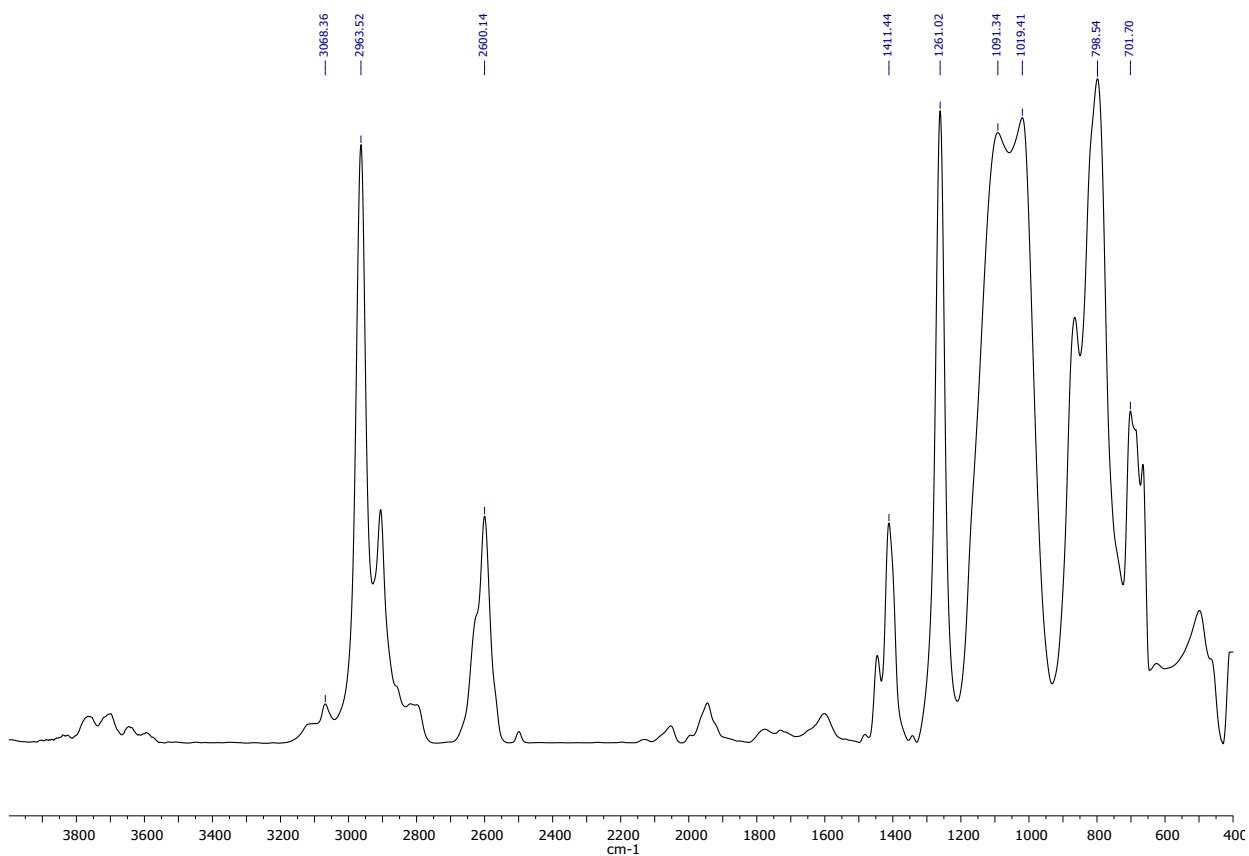

**Figure S19.** IR (cm<sup>-1</sup>) of (2C)

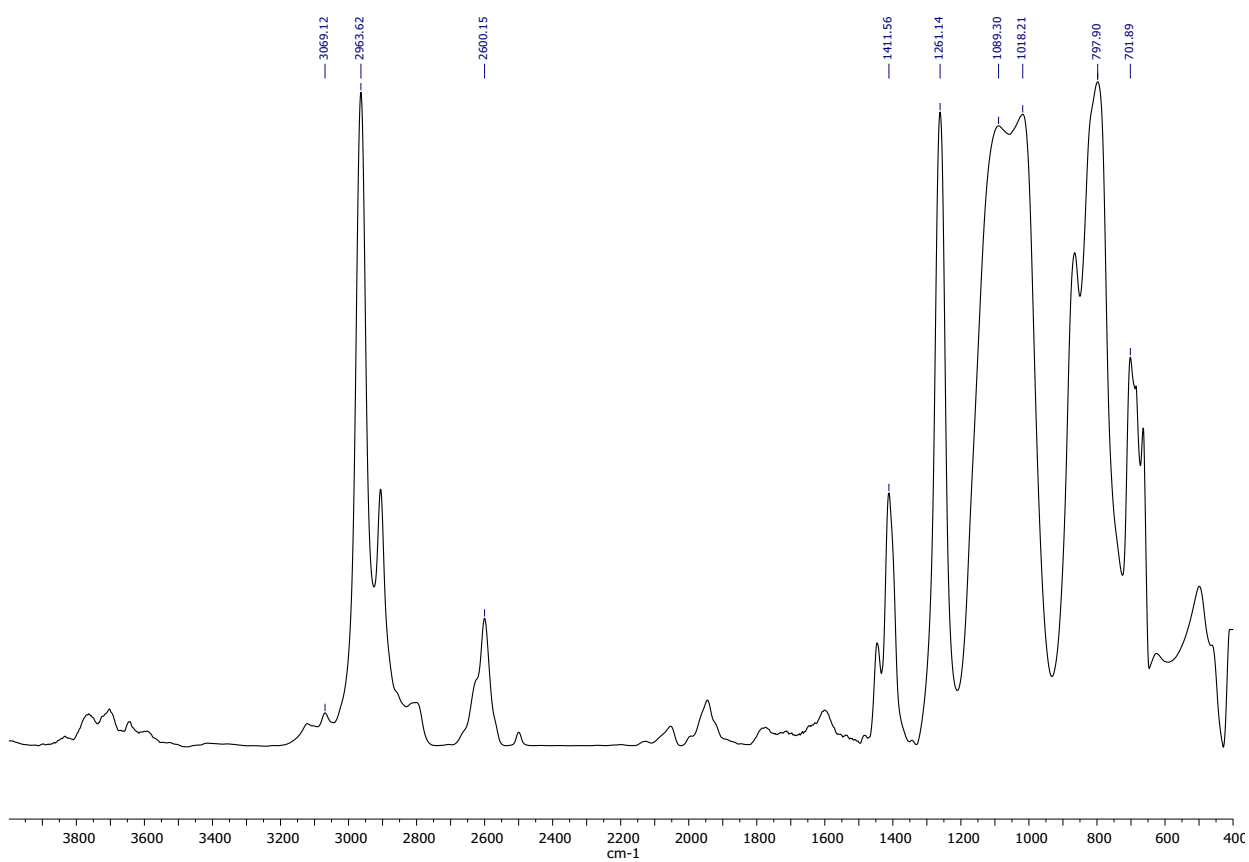

**Figure S20.** IR (cm<sup>-1</sup>) of (2D)

*IR data of the compound 3B:*

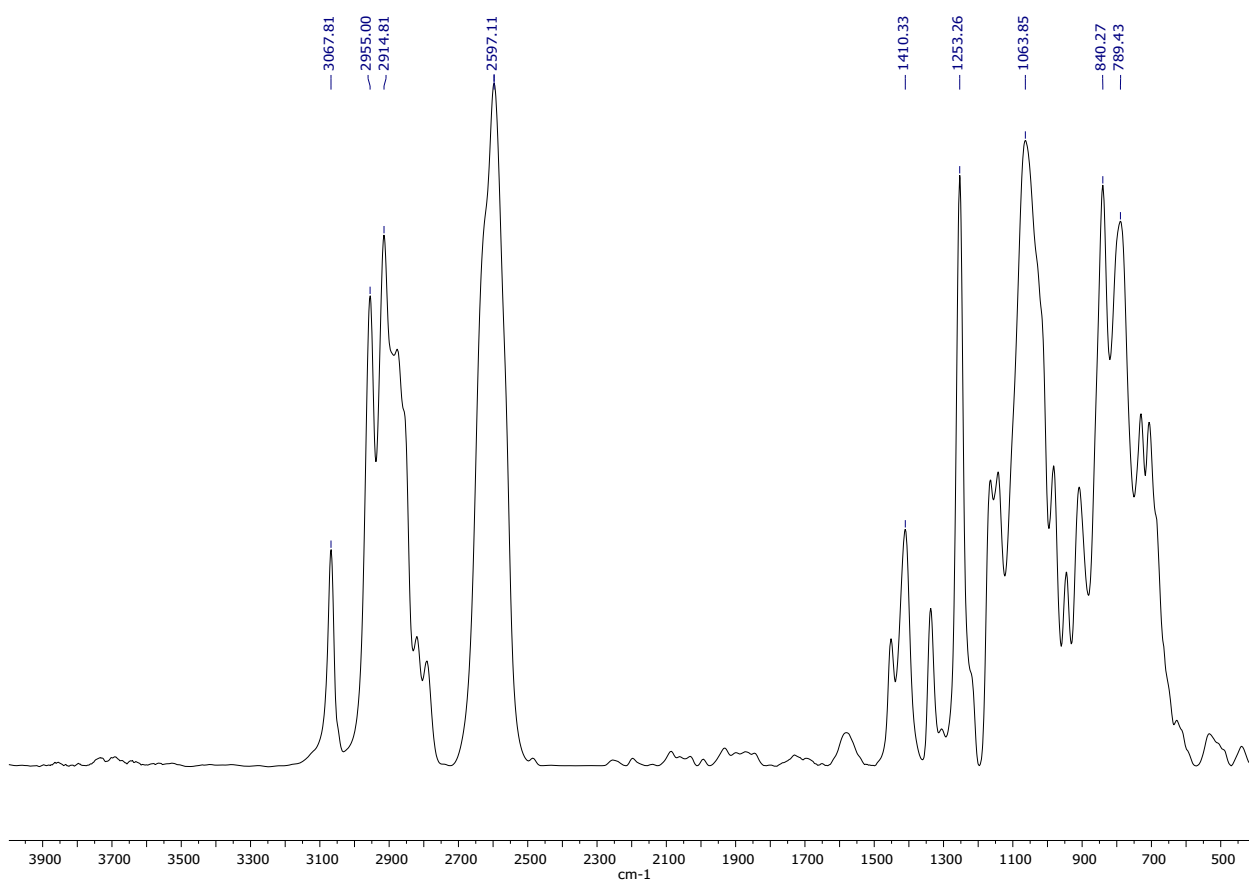

**Figure S21.** IR (cm<sup>-1</sup>) of **(2B)**

Rheological studies data

Flow curves of the compounds 2B – 2C, 3:

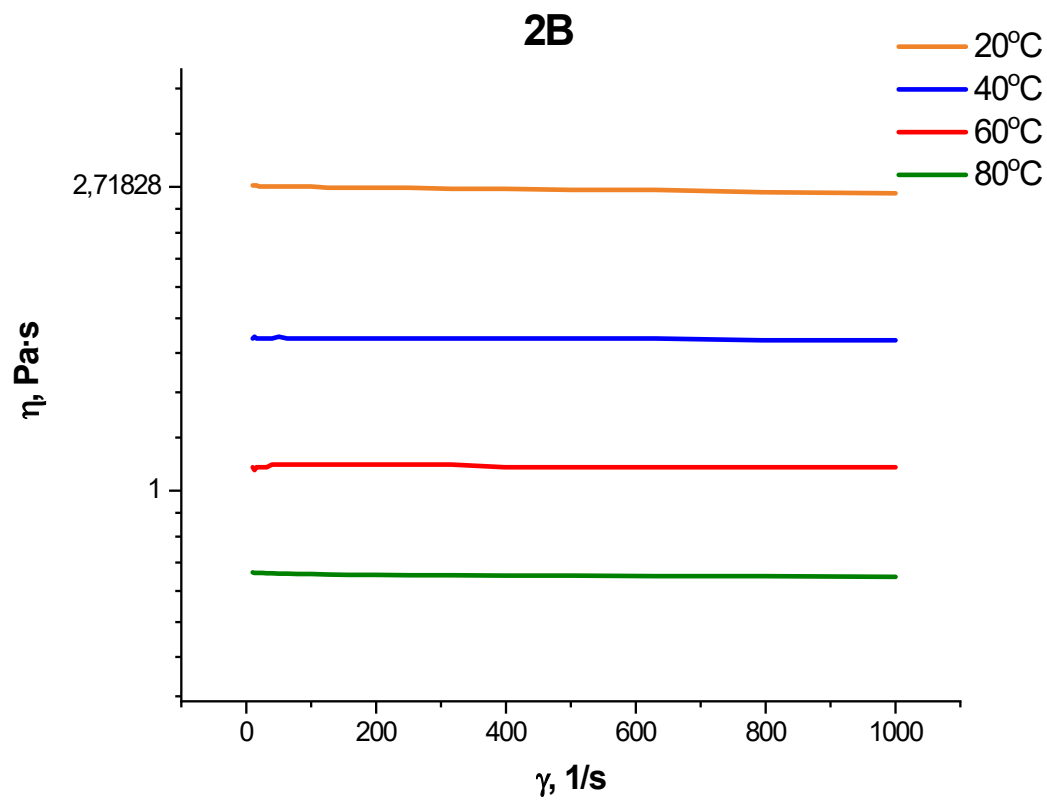

**Figure S22.** Flow curves of (2B) at various temperatures

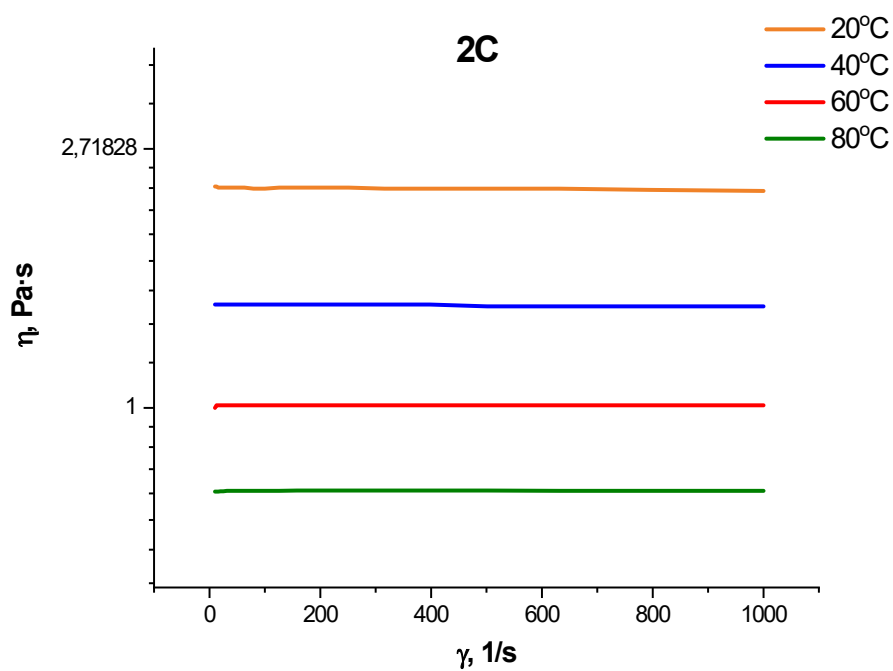

**Figure S23.** Flow curves of (2C) at various temperatures

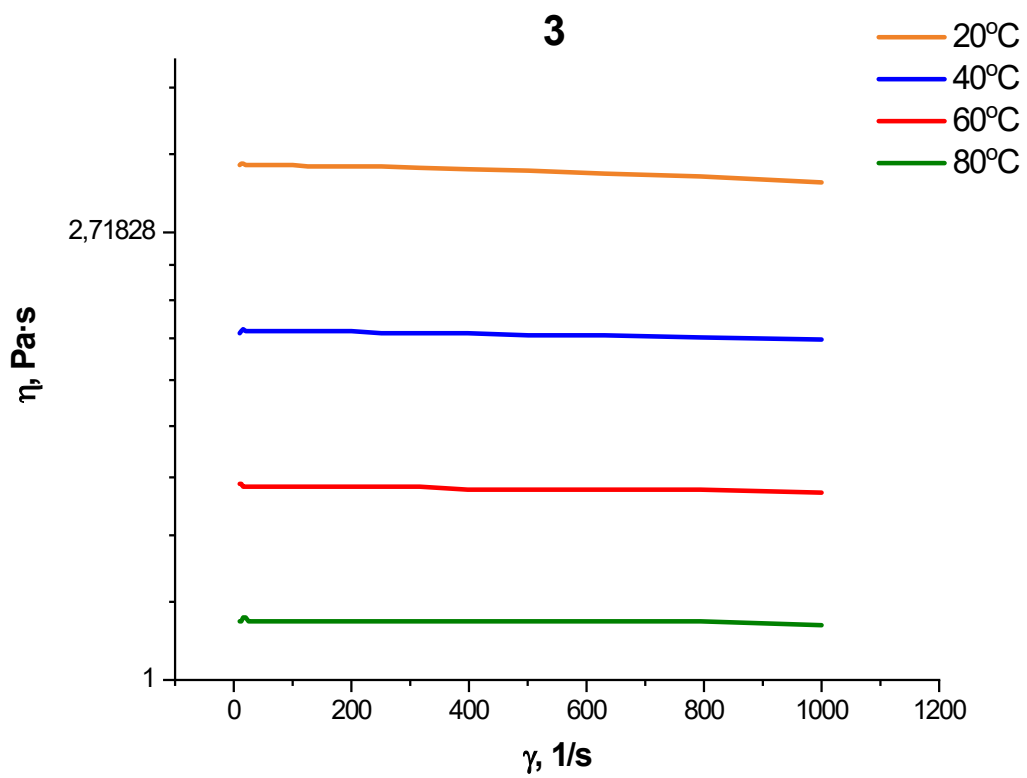

**Figure S24.** Flow curves of **(3)** at various temperatures

DSC data of the compound 2A

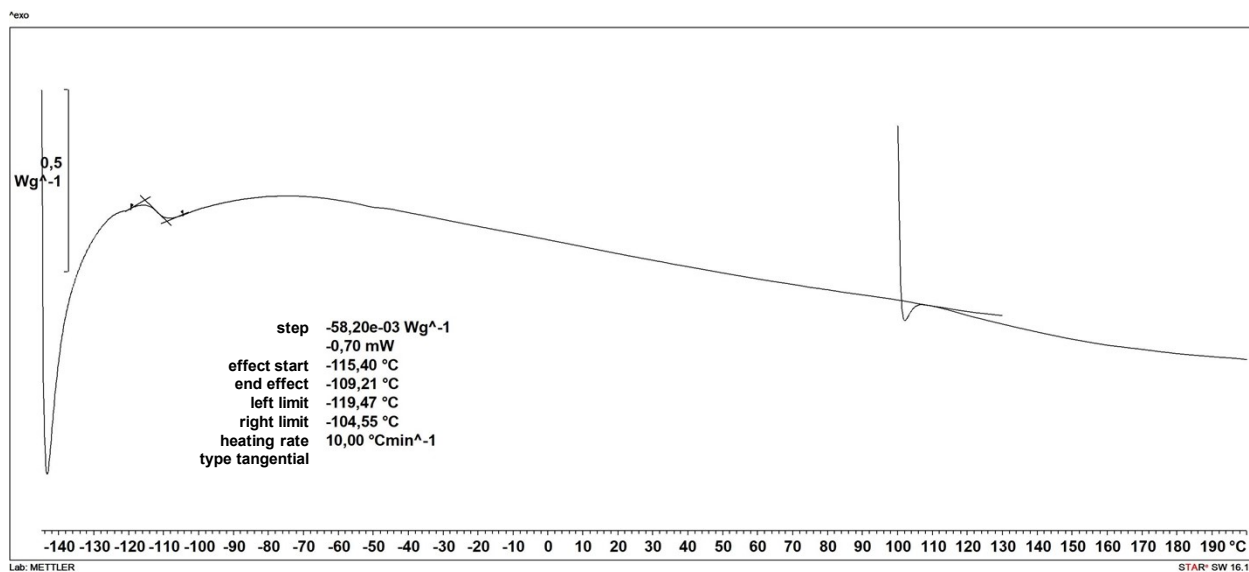

Figure S25. DSC curve of (2A) (1) at a heating rate of 10°C/min
